# Supplementary material for: Humans differ in their personal microbial cloud
Source: PubMed Central journal article supplement (PMC4582947; doi:10.7717/peerj.1258), 2015-09-22

- Air Flow Direction
- Visqueen
- ▨ Plenum

- ◀ Air Filter
- Settling Dish
- ◆ Particle Counter

(a)

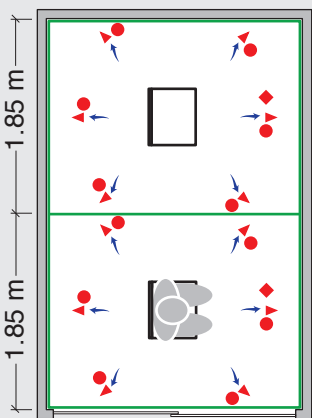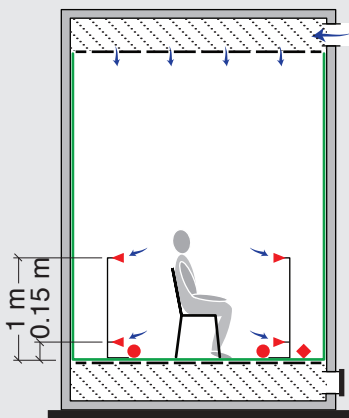

(b)

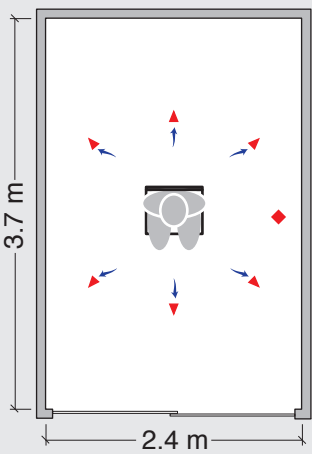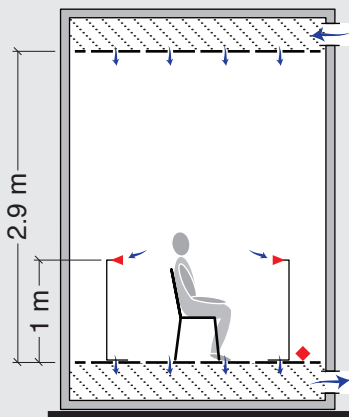

Supplement: peerj-03-1258-s001.pdf [file peerj-03-1258-s001.pdf]
