# Supplementary material for: Humans differ in their personal microbial cloud
Source: PubMed Central journal article supplement (PMC4582947; doi:10.7717/peerj.1258), 2015-09-22
Supplement: peerj-03-1258-s002.pdf [file peerj-03-1258-s002.pdf]

## Supporting Tables

**Table S1: Particle counts during the first experiment generally increased with occupation over 4 hours.**

|           | 10+ $\mu\text{m}^*$ | 5-10 $\mu\text{m}$ | 2.5-5 $\mu\text{m}$ |
|-----------|---------------------|--------------------|---------------------|
| Subject 1 | 14.74               | 2.58               | 1.66                |
| Subject 2 | 29.29               | 4.31               | 2.31                |
| Subject 3 | 1.84                | 0.99               | 0.96                |
| mean      | 15.29               | 2.63               | 1.64                |

\* All counts are expressed as ratios of particles  $\text{L}^{-1} \text{ minute}^{-1}$  above unoccupied controls.
