# Supplementary material for: Humans differ in their personal microbial cloud
Source: PubMed Central journal article supplement (PMC4582947; doi:10.7717/peerj.1258), 2015-09-22

**(a) Air Filters****(b) Settling Dishes**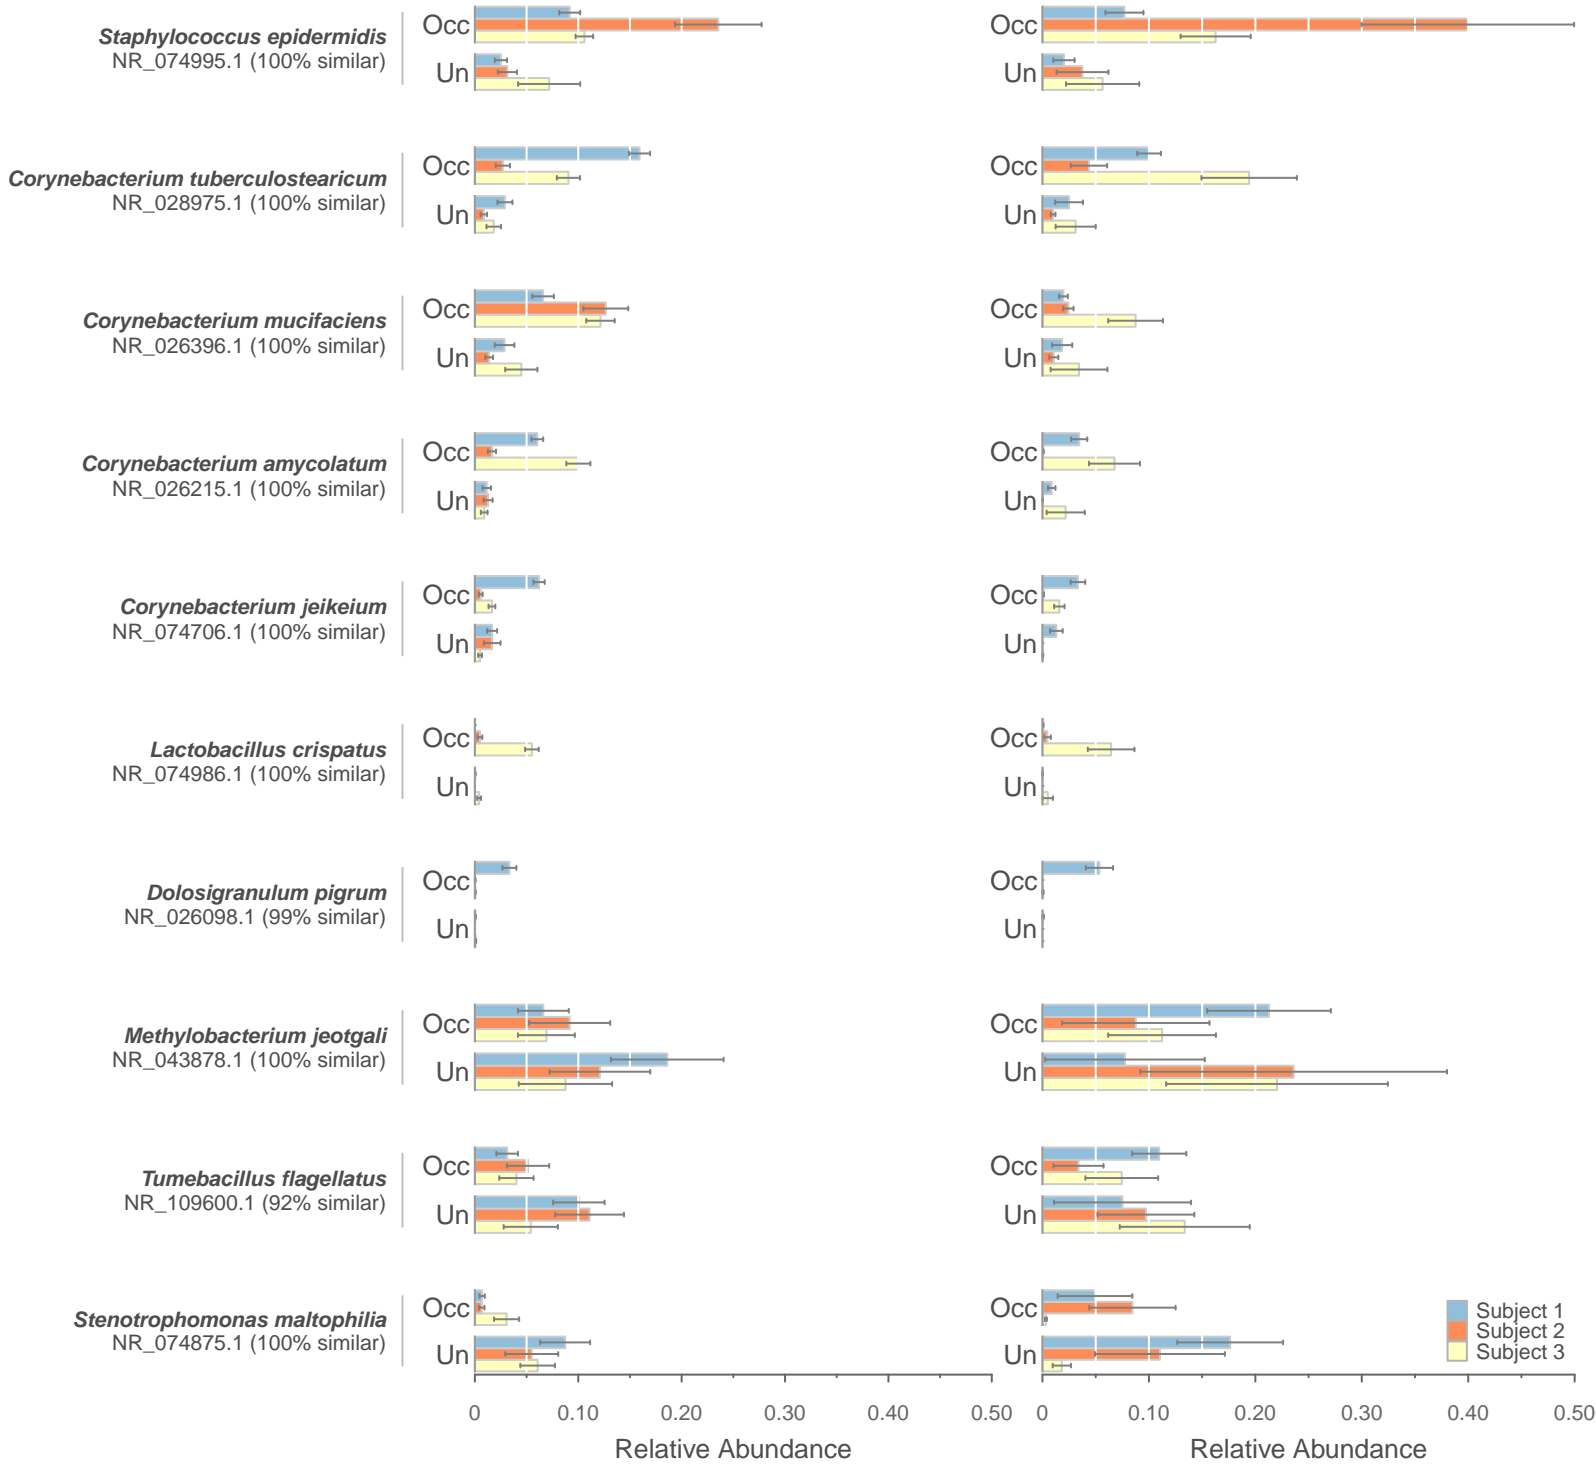

Supplement: peerj-03-1258-s003.pdf [file peerj-03-1258-s003.pdf]
