# Supplementary material for: Humans differ in their personal microbial cloud
Source: PubMed Central journal article supplement (PMC4582947; doi:10.7717/peerj.1258), 2015-09-22

1 Air Change / Hour

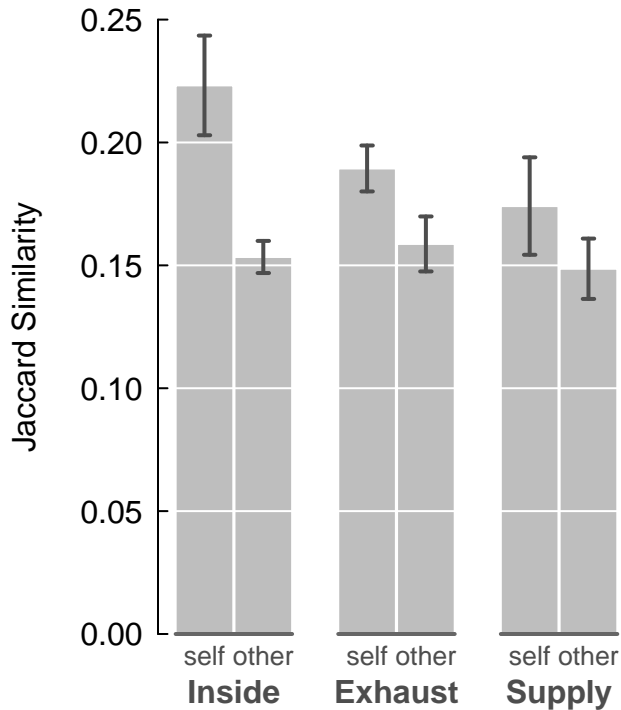

3 Air Changes / Hour

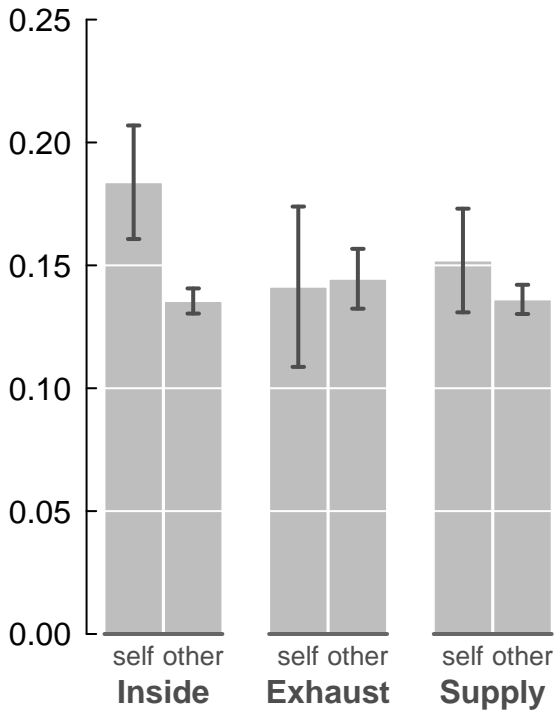

Supplement: peerj-03-1258-s005.pdf [file peerj-03-1258-s005.pdf]
